# Supplementary material for: δ-Tocopherol prevents methylglyoxal-induced apoptosis by reducing ROS generation and inhibiting apoptotic signaling cascades in human umbilical vein endothelial cells
Source: Royal Society of Chemistry journal article supplement (doi:10.1039/c4fo01110d), 2015-01-01

## Supplemental data

Fig. S1. The dose-dependent effects of tocopherols on MGO-induced cell death in HUVECs. Cells were pretreated without (-) or with (+)  $\alpha$ - or  $\delta$ -tocopherols for 1 h followed by 500  $\mu$ M MGO treatment for 24 h. **A** Viability of HUVECs treated without (-) or with (+) MGO and various concentrations of  $\alpha$ -tocopherol and analyzed by MTT assay. **B** Viability of HUVECs treated without (-) or with (+) MGO and various concentrations of  $\delta$ -tocopherol and analyzed by MTT assay. The percent cell viabilities are presented as mean  $\pm$  SD of three independent experiments. (\*\*\*)  $p < 0.001$  vs. control, ##  $p < 0.01$  and ###  $p < 0.001$  vs. 500  $\mu$ M MGO treatment only).

Fig. S2. The effects of tocopherol/MGO pretreatment on MGO-induced cell death in HUVECs. **A** Viability of HUVECs cotreated with MGO and  $\alpha$ - or  $\delta$ -tocopherols and analyzed by MTT assay. **B** Viability of HUVECs pretreated with MGO for 1 h and then exposed to  $\alpha$ - or  $\delta$ -tocopherol for 24 h and analyzed by MTT assay. The percent cell viabilities are presented as mean  $\pm$  SD of three independent experiments. (\*\*\*)  $p < 0.001$  vs. control and ###  $p < 0.001$  vs. 500  $\mu$ M MGO treatment only).

Fig. S1.

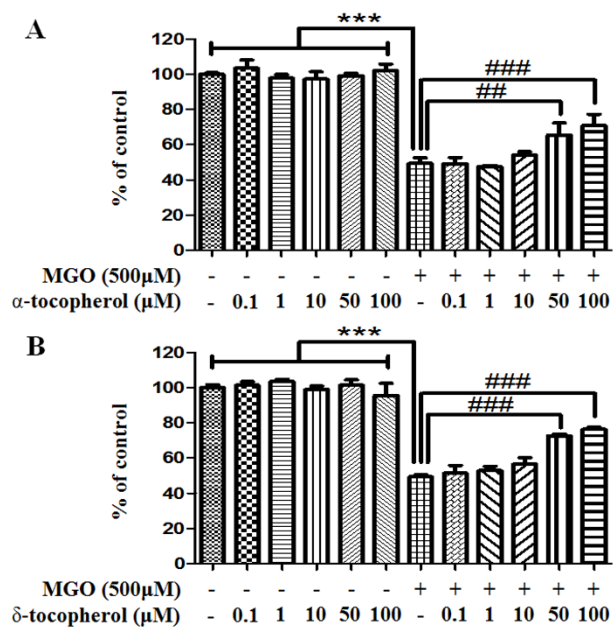

Fig. S2.

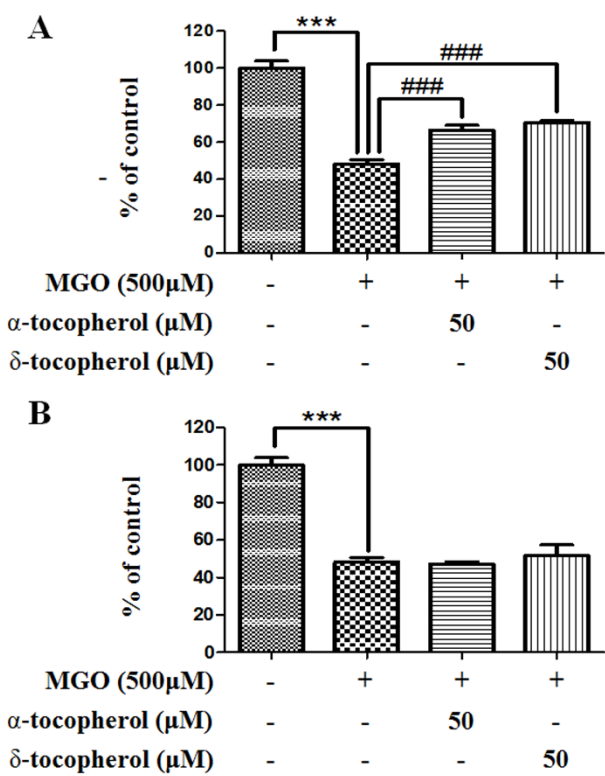

Supplement: c4fo01110d1.pdf [file c4fo01110d1.pdf]
